# Supplementary material for: Topical Glaucoma Therapy Is Associated With Alterations of the Ocular Surface Microbiome
Source: PubMed Central journal article supplement — Invest Ophthalmol Vis Sci. 2022 Aug 29;63(9):32. doi: 10.1167/iovs.63.9.32 (PMC9434984; doi:10.1167/iovs.63.9.32), 2022-08-29
Supplement: iovs-63-9-32_s002.pdf [file iovs-63-9-32_s002.pdf]

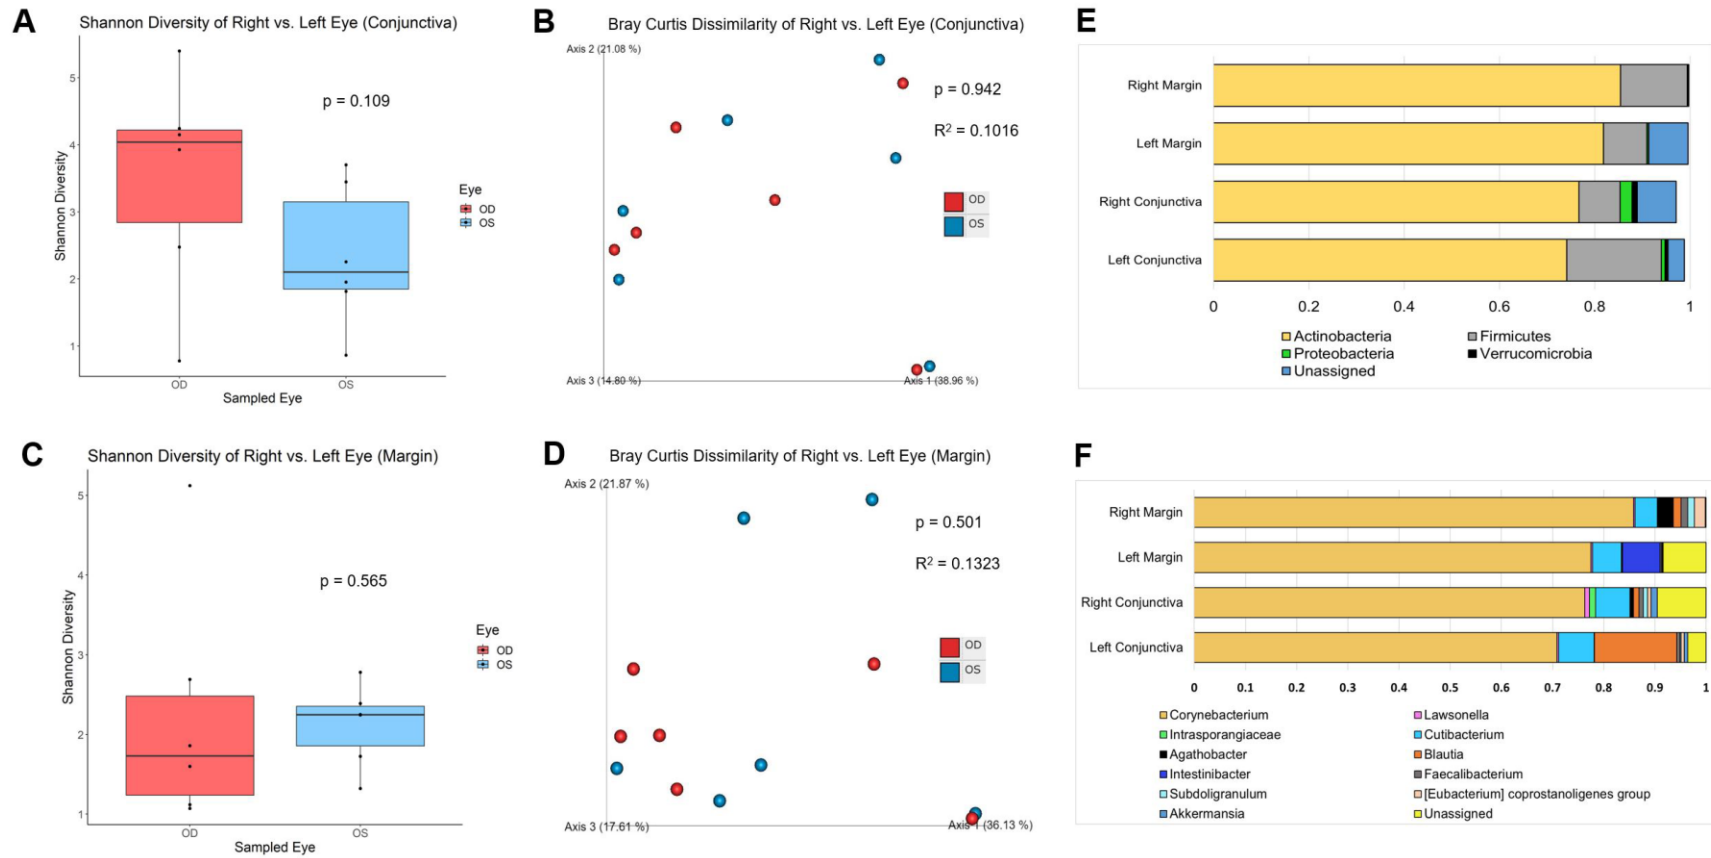

**Supplemental Figure 2. Diversity analysis and taxonomic classification based on sampled eye (Left vs. Right).** Alpha- and beta-diversity comparisons were restricted to control subjects to avoid confounding effects of treatment and/or ocular disease. Analysis was further divided into conjunctiva and margin to control for sampling location. Sampled eye was represented by right (“OD”) (n = 6) compared to left (“OS”) eyes (n = 6). **(A)** No differences were found in alpha-diversity metrics between right and left eyes for Shannon diversity ( $p = 0.109$ , Kruskal-Wallis) for conjunctival eye samples. There were no differences in beta-diversity between right and left eyes for conjunctival eye samples based on **(B)** Bray Curtis distances ( $p = 0.942$ ,  $R^2 = 0.10161$ , PERMANOVA) as visualized on principal coordinates analysis plots. **(C)** No differences were noted in alpha-diversity metrics between right and left eyes in margin samples for Shannon diversity ( $p = 0.565$ , Kruskal-Wallis). In addition, there were no

differences in microbiome composition based on beta-diversity between the right and left eyes of margin samples based on **(D)** Bray Curtis distances ( $p = 0.501$ ,  $R^2 = 0.13225$ , PERMANOVA). The average relative abundance of taxonomic classifications to amplicon sequence variants (ASVs) for right and left margin/conjunctival eye samples are displayed at the phylum **(E)** and genus **(F)** level, with no significant differentially abundant taxa. Only taxonomic classifications with  $>1\%$  (0.01) average relative abundance are shown. The axis values in beta-diversity plots **(C, D)** are the percentage of variance of phylogenetic beta diversity.
