# Supplementary material for: Topical Glaucoma Therapy Is Associated With Alterations of the Ocular Surface Microbiome
Source: PubMed Central journal article supplement — Invest Ophthalmol Vis Sci. 2022 Aug 29;63(9):32. doi: 10.1167/iovs.63.9.32 (PMC9434984; doi:10.1167/iovs.63.9.32), 2022-08-29
Supplement: iovs-63-9-32_s004.pdf [file iovs-63-9-32_s004.pdf]

| <b>Microbial organisms and taxonomic classification to ASVs</b> |                   |                                     |                   |                       |                |
|-----------------------------------------------------------------|-------------------|-------------------------------------|-------------------|-----------------------|----------------|
|                                                                 | <b>Phyla</b>      | <b>Genus</b>                        | <b>Species</b>    | <b>Log2FoldChange</b> | <b>p-value</b> |
| <b>Abundant in Patient Eye Samples with Eyedrops</b>            | Proteobacteria    | Komagataeibacter                    | rhaeticus/xylinus | 4.363                 | 1.77E-10       |
|                                                                 | Firmicutes        | Eubacterium siraeum                 | ..                | 4.238                 | 1.87E-09       |
|                                                                 | Verrucomicrobiota | Akkermansia                         | muciniphila       | 4.228                 | 5.11E-08       |
|                                                                 | Firmicutes        | Eubacterium eligens                 | ..                | 3.861                 | 1.46E-08       |
|                                                                 | Actinobacteriota  | Bifidobacterium                     | bifidum           | 3.765                 | 6.45E-08       |
|                                                                 | Firmicutes        | Ruminococcaceae CAG-352             | ..                | 3.364                 | 8.78E-06       |
|                                                                 | Firmicutes        | Blautia                             | ..                | 3.320                 | 1.78E-06       |
|                                                                 | Firmicutes        | Oscillospiraceae NK4A214 group      | ..                | 3.306                 | 1.25E-06       |
|                                                                 | Firmicutes        | Lachnospiraceae NK4A136 group       | ..                | 3.240                 | 8.78E-06       |
|                                                                 | Firmicutes        | Gaecalibacterium                    | prausnitzii       | 3.042                 | 2.47E-05       |
|                                                                 | Proteobacteria    | Gluconobacter                       | oxydans           | 2.965                 | 7.68E-06       |
|                                                                 | Firmicutes        | Faecalibacterium                    | prausnitzii       | 2.953                 | 0.0018         |
|                                                                 | Firmicutes        | Lachnospiraceae genus               | ..                | 2.947                 | 2.88E-05       |
|                                                                 | Actinobacteriota  | Bifidobacterium                     | longum            | 2.918                 | 0.0021         |
|                                                                 | Firmicutes        | Lachnospiraceae NK4A136 group       | ..                | 2.847                 | 2.38E-05       |
|                                                                 | Firmicutes        | Ruminococcus torques group          | ..                | 2.827                 | 4.39E-05       |
|                                                                 | Firmicutes        | Roseburia                           | ..                | 2.815                 | 4.39E-05       |
|                                                                 | Firmicutes        | Eubacterium coprostanoligenes group | ..                | 2.811                 | 8.69E-05       |
|                                                                 | Firmicutes        | Ruminococcus torques group          | ..                | 2.764                 | 5.40E-05       |
|                                                                 | Firmicutes        | Roseburia                           | inulinivorans     | 2.763                 | 6.11E-04       |
|                                                                 | Firmicutes        | Oscillospiraceae genus              | ..                | 2.762                 | 3.07E-05       |
|                                                                 | Firmicutes        | Monoglobus                          | ..                | 2.606                 | 3.88E-04       |
|                                                                 | Firmicutes        | Lachnospira                         | ..                | 2.572                 | 1.76E-04       |
|                                                                 | Firmicutes        | Ruminococcus gnavus group           | ..                | 2.560                 | 6.79E-04       |
|                                                                 | Firmicutes        | Oscillospiraceae UCG-002            | ..                | 2.537                 | 6.79E-04       |
|                                                                 | Firmicutes        | Clostridia vadin BB60 group         | ..                | 2.534                 | 3.55E-04       |
|                                                                 | Firmicutes        | Lachnospiraceae NK4A136 group       | ..                | 2.499                 | 6.79E-04       |
|                                                                 | Firmicutes        | Lachnospiraceae genus               | ..                | 2.469                 | 6.11E-04       |
|                                                                 | Verrucomicrobiota | Akkermansia                         | muciniphila       | 2.453                 | 0.021          |
|                                                                 | Firmicutes        | Ruminococcus                        | callidus          | 2.405                 | 6.79E-04       |
|                                                                 | Firmicutes        | Clostridia vadin BB60 group         | ..                | 2.379                 | 6.79E-04       |
|                                                                 | Firmicutes        | Negativibacillus                    | ..                | 2.350                 | 7.70E-04       |
|                                                                 | Firmicutes        | Ruminococcus                        | bromii            | 2.342                 | 0.0046         |
|                                                                 | Firmicutes        | Oscillibacter                       | ..                | 2.342                 | 6.79E-04       |
|                                                                 | Firmicutes        | Lachnospiraceae NK4A136 group       | ..                | 2.306                 | 6.63E-04       |
|                                                                 | Firmicutes        | Eubacterium coprostanoligenes       | ..                | 2.278                 | 0.0011         |
|                                                                 | Firmicutes        | Blautia                             | obeum/wexlerae    | 2.179                 | 0.0089         |
|                                                                 | Firmicutes        | Lachnospiraceae NK4A136 group       | ..                | 2.166                 | 0.030          |
|                                                                 | Firmicutes        | Anaerococcus                        | vaginalis         | 2.109                 | 0.014          |
|                                                                 | Firmicutes        | Lachnospiraceae NK4A136 group       | ..                | 2.091                 | 0.015          |
|                                                                 | Firmicutes        | Lachnoclostridium                   | ..                | 2.077                 | 0.014          |
|                                                                 | Firmicutes        | Anaerostipes                        | hadrus            | 2.016                 | 0.0044         |
|                                                                 | Firmicutes        | Roseburia                           | intestinalis      | 1.963                 | 0.014          |
|                                                                 | Actinobacteriota  | Rothia                              | mucilaginososa    | 1.944                 | 0.033          |
|                                                                 | Firmicutes        | Eubacterium hallii group            | ..                | 1.908                 | 0.021          |
| Firmicutes                                                      | Flavonifractor    | plautii                             | 1.899             | 0.041                 |                |
| Firmicutes                                                      | Butyricicoccus    | ..                                  | 1.886             | 0.0055                |                |
| Actinobacteriota                                                | Enterorhabdus     | ..                                  | 1.846             | 0.015                 |                |
| Firmicutes                                                      | Ezakiella         | ..                                  | 1.818             | 0.017                 |                |
| Firmicutes                                                      | Faecalibacterium  | prausnitzii                         | 1.800             | 0.036                 |                |
| Firmicutes                                                      | Intestinibacter   | bartlettii                          | 1.728             | 0.015                 |                |

|                              |                  |                               |                                                         |          |          |
|------------------------------|------------------|-------------------------------|---------------------------------------------------------|----------|----------|
| Abundant in Control Subjects | Firmicutes       | Ruminococcaceae genus         | ..                                                      | 1.720    | 0.025    |
|                              | Firmicutes       | Peptoniphilus                 | coxii                                                   | 1.700    | 0.019    |
|                              | Firmicutes       | Eubacterium coprostanoligenes | ..                                                      | 1.610    | 0.039    |
|                              | Firmicutes       | Blautia                       | ..                                                      | 1.561    | 0.037    |
|                              | Firmicutes       | Ruminococcaceae genus         | ..                                                      | 1.560    | 0.037    |
|                              | Firmicutes       | Anaerostipes                  | ..                                                      | 1.511    | 0.048    |
|                              | Proteobacteria   | Bradyrhizobium                | ..                                                      | -1.741   | 0.046    |
|                              | Actinobacteriota | Rothia                        | dentocariosa                                            | -1.822   | 0.018    |
|                              | Firmicutes       | Blautia                       | coccoides/hansenii/mar<br>asmi/producta                 | -1.906   | 0.020    |
|                              | Proteobacteria   | Sphingobium                   | yanoikuyae                                              | -1.946   | 0.017    |
|                              | Firmicutes       | Lachnospiraceae genus         | ..                                                      | -1.960   | 0.020    |
|                              | Firmicutes       | Lachnospiraceae A2 group      | ..                                                      | -1.973   | 0.025    |
|                              | Firmicutes       | Clostridium sensu stricto 1   | perfringens/thermophilu<br>s                            | -1.986   | 0.014    |
|                              | Actinobacteriota | Micrococcus                   | aloverae/luteus/lylae/y<br>unnanensis                   | -1.987   | 0.015    |
|                              | Actinobacteriota | Lawsonella                    | ..                                                      | -2.063   | 0.021    |
|                              | Actinobacteriota | Corynebacterium               | fournieri/mucifaciens/ur<br>eicelerivorans              | -2.111   | 0.010    |
|                              | Proteobacteria   | Novosphingobium               | ..                                                      | -2.290   | 0.0018   |
|                              | Firmicutes       | Eubacterium ruminantium group | ..                                                      | -2.321   | 0.0044   |
|                              | Firmicutes       | Anaerococcus                  | ..                                                      | -2.401   | 0.0012   |
|                              | Actinobacteriota | Corynebacterium               | kroppenstedtii                                          | -2.569   | 0.0032   |
|                              | Actinobacteriota | Bifidobacterium               | adolescentis/faecale/ster<br>coris                      | -2.747   | 3.80E-04 |
|                              | Actinobacteriota | Lawsonella                    | ..                                                      | -3.487   | 1.10E-04 |
|                              | Actinobacteriota | Cutibacterium                 | granulosum                                              | -3.791   | 2.75E-07 |
|                              | Actinobacteriota | Corynebacterium               | kroppenstedtii                                          | -4.238   | 9.32E-04 |
|                              | Actinobacteriota | Corynebacterium               | kroppenstedtii                                          | -4.324   | 2.28E-07 |
|                              | Actinobacteriota | Cutibacterium                 | ..                                                      | -4.518   | 1.29E-07 |
|                              | Actinobacteriota | Corynebacterium               | aurimucosum/pseudoge<br>nitalium/tuberculosteari<br>cum | -5.142   | 3.10E-08 |
|                              | Actinobacteriota | Corynebacterium               | kroppenstedtii                                          | -5.269   | 1.92E-09 |
|                              | Actinobacteriota | Cutibacterium                 | acnes/avidum                                            | -5.720   | 2.54E-13 |
|                              | Actinobacteriota | Corynebacterium               | bovis                                                   | -6.193   | 1.06E-11 |
|                              | Actinobacteriota | Corynebacterium               | kroppenstedtii                                          | -6.468   | 3.09E-11 |
|                              | Actinobacteriota | Corynebacterium               | ..                                                      | -7.277   | 1.15E-12 |
| Actinobacteriota             | Corynebacterium  | ..                            | -7.556                                                  | 7.82E-20 |          |
| Actinobacteriota             | Corynebacterium  | kroppenstedtii                | -7.566                                                  | 2.02E-16 |          |
| Actinobacteriota             | Corynebacterium  | macginleyi                    | -9.671                                                  | 8.55E-23 |          |
| Actinobacteriota             | Corynebacterium  | bovis                         | -9.839                                                  | 2.21E-21 |          |

**Supplemental Table 1. Microbial organisms associated with relatively abundant amplicon sequence variants (ASVs) in control subjects compared to eyedrop treated patients.** Eyedrop treated patients represent eye samples obtained in the patient eyes with a diagnosis of glaucoma receiving topical medication therapy. ASVs were classified taxonomically using QIIME2 q2-feature-classifier plugin by identifying k-mers that are diagnostic for particular taxonomic groups. In our analysis, we used a 99% SILVA reference set trained on the 16S region. The classified phyla, genus, and species are noted in the table. Log2foldchange is the effect size estimate representing the change in abundance of an ASV, with increased abundance in eyedrop treated patient eye samples as positive values and increased abundance in control subjects as negative values. The p-values are generated using the Wald test and corrected for false discovery rate (FDR) using the Benjamini and Hochberg method. Corrected p-values < 0.05 were considered significant. Only significantly abundant organisms were included in the table and corrected p-values are shown.
