# Supplementary material for: Topical Glaucoma Therapy Is Associated With Alterations of the Ocular Surface Microbiome
Source: PubMed Central journal article supplement — Invest Ophthalmol Vis Sci. 2022 Aug 29;63(9):32. doi: 10.1167/iovs.63.9.32 (PMC9434984; doi:10.1167/iovs.63.9.32), 2022-08-29
Supplement: iovs-63-9-32_s005.pdf [file iovs-63-9-32_s005.pdf]

| <b>Microbial organisms and taxonomic classification to ASVs</b> |                          |                                           |                   |                       |                |
|-----------------------------------------------------------------|--------------------------|-------------------------------------------|-------------------|-----------------------|----------------|
|                                                                 | <b>Phylum</b>            | <b>Genus</b>                              | <b>Species</b>    | <b>Log2FoldChange</b> | <b>p-value</b> |
| <b>Abundant in Patient Samples Without Eyedrops</b>             | Verrucomicrobiota        | Akkermansia                               | muciniphila       | 4.483                 | 4.78E-08       |
|                                                                 | Firmicutes               | Eubacterium siraeum group                 | ..                | 4.209                 | 9.76E-11       |
|                                                                 | Verrucomicrobiota        | Akkermansia                               | muciniphila       | 4.183                 | 4.50E-08       |
|                                                                 | Proteobacteria           | Gluconobacter                             | ..                | 3.973                 | 4.53E-10       |
|                                                                 | Actinobacteriota         | Bifidobacterium                           | bifidum           | 3.678                 | 6.55E-09       |
|                                                                 | Firmicutes               | Roseburia                                 | intestinalis      | 3.308                 | 2.40E-07       |
|                                                                 | Firmicutes               | Ruminococcus torques group                | ..                | 3.242                 | 4.03E-06       |
|                                                                 | Actinobacteriota         | Bifidobacterium                           | longum            | 3.159                 | 1.12E-04       |
|                                                                 | Firmicutes               | Lachnospiraceae                           | ..                | 3.000                 | 4.78E-06       |
|                                                                 | Firmicutes               | Blautia                                   | ..                | 2.877                 | 3.15E-06       |
|                                                                 | Firmicutes               | Oscillospiraceae UCG-002                  | ..                | 2.877                 | 3.37E-06       |
|                                                                 | Firmicutes               | Faecalibacterium                          | prausnitzii       | 2.871                 | 1.15E-04       |
|                                                                 | Firmicutes               | Lachnospiraceae NK4A136 group             | ..                | 2.868                 | 3.40E-06       |
|                                                                 | Firmicutes               | Lachnospiraceae NK4A136 group             | ..                | 2.868                 | 3.94E-06       |
|                                                                 | Firmicutes               | Oscillospiraceae UCG-002                  | ..                | 2.838                 | 8.13E-06       |
|                                                                 | Firmicutes               | Oscillospiraceae NKA214 group             | ..                | 2.700                 | 2.07E-05       |
|                                                                 | Firmicutes               | Faecalibacterium                          | prausnitzii       | 2.692                 | 0.0020         |
|                                                                 | Proteobacteria           | Komagataeibacter                          | rhaeticus/xylinus | 2.667                 | 7.00E-06       |
|                                                                 | Firmicutes               | Eubacterium xylanophilum group            | ..                | 2.643                 | 2.09E-05       |
|                                                                 | Firmicutes               | Blautia                                   | Obeum/wexlerae    | 2.621                 | 6.43E-05       |
|                                                                 | Firmicutes               | Oscillospiraceae                          | ..                | 2.561                 | 2.33E-05       |
|                                                                 | Firmicutes               | Eubacterium coprostanoligenes group       | ..                | 2.548                 | 2.12E-05       |
|                                                                 | Firmicutes               | Ruminococcaceae CAG-352                   | ..                | 2.498                 | 8.34E-05       |
|                                                                 | Firmicutes               | Lachnospiraceae NK4A136 group             | ..                | 2.365                 | 3.28E-05       |
|                                                                 | Firmicutes               | Clostridia UCG-014                        | ..                | 2.336                 | 3.03E-04       |
|                                                                 | Firmicutes               | Christensenellaceae R-7 group             | ..                | 2.336                 | 1.94E-04       |
|                                                                 | Firmicutes               | Eubacterium eligens group                 | ..                | 2.322                 | 1.96E-04       |
|                                                                 | Firmicutes               | Intestimonas                              | ..                | 2.321                 | 1.15E-04       |
|                                                                 | Firmicutes               | Colidextribacter                          | ..                | 2.247                 | 1.72E-04       |
|                                                                 | Firmicutes               | Intestimonas                              | ..                | 2.238                 | 5.29E-04       |
|                                                                 | Firmicutes               | Candidatus                                | arthromitus       | 2.233                 | 1.92E-04       |
|                                                                 | Firmicutes               | Roseburia                                 | inulinivorans     | 2.165                 | 0.0020         |
|                                                                 | Firmicutes               | Agathobacter                              | ..                | 2.028                 | 0.015          |
|                                                                 | Firmicutes               | Faecalibacterium                          | prausnitzii       | 1.992                 | 0.0012         |
|                                                                 | Firmicutes               | Lachnospira                               | ..                | 1.982                 | 2.80E-04       |
|                                                                 | Firmicutes               | Eubacterium coprostanoligenes group       | ..                | 1.964                 | 7.91E-04       |
|                                                                 | Firmicutes               | Monoglobus                                | ..                | 1.959                 | 0.0036         |
|                                                                 | Firmicutes               | Anaerovoracaceae Family XIII AD3011 group | ..                | 1.906                 | 0.0015         |
|                                                                 | Firmicutes               | Oscillospiraceae UCG-002                  | ..                | 1.906                 | 0.0015         |
|                                                                 | Firmicutes               | Christensenellaceae R-7 group             | ..                | 1.887                 | 0.0017         |
|                                                                 | Firmicutes               | Eubacterium eligens group                 | ..                | 1.878                 | 0.0052         |
|                                                                 | Firmicutes               | Methanobrevibacter                        | ..                | 1.872                 | 0.0054         |
|                                                                 | Firmicutes               | Eubacterium eligens group                 | ..                | 1.868                 | 0.0019         |
|                                                                 | Firmicutes               | Lactobacillus                             | ..                | 1.848                 | 0.0020         |
|                                                                 | Firmicutes               | Subdoligranulum                           | ..                | 1.827                 | 0.0022         |
| Firmicutes                                                      | Anaerostipes             | hadrus                                    | 1.808             | 0.0024                |                |
| Firmicutes                                                      | Oscillospiraceae UCG-002 | ..                                        | 1.772             | 0.016                 |                |

Abundant in Patient Samples Without Eyedrops

|                   |                                     |                      |        |        |
|-------------------|-------------------------------------|----------------------|--------|--------|
| Firmicutes        | Faecalibacterium                    | prausnitzii          | 1.731  | 0.010  |
| Firmicutes        | Clostridia vadin BB60 group         | ..                   | 1.722  | 0.0030 |
| Firmicutes        | Oscillospiraceae UCG-002            | ..                   | 1.717  | 0.017  |
| Firmicutes        | Incertae Sedis                      | ..                   | 1.678  | 0.0063 |
| Firmicutes        | Incertae Sedis                      | ..                   | 1.656  | 0.0052 |
| Firmicutes        | Ruminococcus                        | bicirculans          | 1.656  | 0.0071 |
| Actinobacteriota  | Bifidobacterium                     | ..                   | 1.655  | 0.0036 |
| Patescibacteria   | Candidatus Saccharimonas            | ..                   | 1.610  | 0.0063 |
| Firmicutes        | Blautia                             | ..                   | 1.610  | 0.0045 |
| Firmicutes        | Ruminococcus                        | callidus             | 1.585  | 0.0075 |
| Firmicutes        | Ruminococcus                        | ..                   | 1.585  | 0.0054 |
| Firmicutes        | Negativibacillus                    | ..                   | 1.561  | 0.0086 |
| Firmicutes        | Lachnospiraceae NK4A136 group       | ..                   | 1.536  | 0.0088 |
| Firmicutes        | Oscillospiraceae UCG-003            | ..                   | 1.519  | 0.016  |
| Firmicutes        | Romboutsia                          | ilealis/timonensis   | 1.486  | 0.0074 |
| Synergistota      | Cloacibacillus                      | ..                   | 1.460  | 0.016  |
| Firmicutes        | Clostridia UCG-014                  | ..                   | 1.460  | 0.016  |
| Firmicutes        | Lachnoclostridium                   | ..                   | 1.460  | 0.016  |
| Firmicutes        | Lachnospiraceae NK4A136 group       | ..                   | 1.442  | 0.036  |
| Firmicutes        | Lachnospira                         | pectinoschiza        | 1.404  | 0.030  |
| Actinobacteriota  | Enterorhabdus                       | ..                   | 1.403  | 0.019  |
| Firmicutes        | Anaerostipes                        | ..                   | 1.379  | 0.021  |
| Firmicutes        | Lachnospiraceae genus               | ..                   | 1.351  | 0.018  |
| Firmicutes        | Lachnospiraceae A2                  | ..                   | 1.338  | 0.024  |
| Firmicutes        | Ruminococcaceae genus               | ..                   | 1.321  | 0.021  |
| Firmicutes        | Oscillibacter                       | ..                   | 1.299  | 0.028  |
| Firmicutes        | Peptoniphilus                       | ..                   | 1.294  | 0.024  |
| Firmicutes        | Selenomonadales                     | ..                   | 1.293  | 0.027  |
| Firmicutes        | Agathobacter                        | ..                   | 1.283  | 0.042  |
| Firmicutes        | Eubacterium nodatum group           | ..                   | 1.264  | 0.024  |
| Firmicutes        | Eubacterium coprostanoligenes group | ..                   | 1.263  | 0.024  |
| Verrucomicrobiota | Akkermansia                         | ..                   | 1.233  | 0.026  |
| Firmicutes        | Roseburia                           | ..                   | 1.232  | 0.033  |
| Firmicutes        | Peptoniphilus                       | ..                   | 1.105  | 0.030  |
| Firmicutes        | Colidextribacter                    | ..                   | 1.104  | 0.045  |
| Bacteroidota      | Muribaculaceae                      | ..                   | 1.071  | 0.032  |
| Firmicutes        | Blautia                             | ..                   | 1.037  | 0.042  |
| Firmicutes        | Christensenellaceae genus           | ..                   | 1.036  | 0.042  |
| Actinobacteriota  | Enterorhabdus                       | ..                   | -1.279 | 0.044  |
| Firmicutes        | Agathobacter                        | ..                   | -1.321 | 0.044  |
| Firmicutes        | Eubacterium coprostanoligenes group | ..                   | -1.382 | 0.036  |
| Firmicutes        | Peptoniphilus                       | ..                   | -1.382 | 0.024  |
| Firmicutes        | Blautia                             | ..                   | -1.382 | 0.036  |
| Actinobacteriota  | Slackia                             | isoflavoniconvertens | -1.420 | 0.032  |
| Proteobacteria    | Methylobacterium                    | jeotgali             | -1.439 | 0.022  |
| Firmicutes        | Roseburia                           | ..                   | -1.440 | 0.025  |

|                                     |                  |                                           |                                                     |          |          |
|-------------------------------------|------------------|-------------------------------------------|-----------------------------------------------------|----------|----------|
| Abundant in Control Subject Samples | Firmicutes       | Anaerovoracaceae Family XIII AD3011 group | ..                                                  | -1.513   | 0.024    |
|                                     | Bacteriodota     | Muribaculaceae                            | ..                                                  | -1.533   | 0.023    |
|                                     | Actinobacteriota | Corynebacterium                           | afermentans/coyleae                                 | -1.549   | 0.016    |
|                                     | Actinobacteriota | Atopobium                                 | parvulum                                            | -1.550   | 0.024    |
|                                     | Patescibacteria  | Endobacter                                | medicaginis                                         | -1.567   | 0.021    |
|                                     | Firmicutes       | Lachnospiraceae NK4A136 group             | ..                                                  | -1.600   | 0.016    |
|                                     | Firmicutes       | Roseburia                                 | hominis                                             | -1.600   | 0.019    |
|                                     | Actinobacteriota | Rothia                                    | ..                                                  | -1.601   | 0.016    |
|                                     | Firmicutes       | Tyzzera                                   | ..                                                  | -1.606   | 0.016    |
|                                     | Actinobacteriota | Eggerthella                               | lenta                                               | -1.634   | 0.017    |
|                                     | Firmicutes       | Oscillospiraceae UCG-002                  | ..                                                  | -1.635   | 0.017    |
|                                     | Actinobacteriota | Lawsonella                                | ..                                                  | -1.683   | 0.021    |
|                                     | Firmicutes       | Agathobacter                              | ..                                                  | -1.805   | 0.0080   |
|                                     | Actinobacteriota | Rothia                                    | dentocariosa                                        | -1.821   | 0.0038   |
|                                     | Proteobacteria   | Sphingobium                               | yanoikuyae                                          | -1.945   | 0.0036   |
|                                     | Actinobacteriota | Micrococcus                               | aloeverae/luteus/lylae/yunnanensis                  | -1.985   | 0.0032   |
|                                     | Firmicutes       | Lachnospiraceae A2                        | ..                                                  | -2.046   | 0.0042   |
|                                     | Actinobacteriota | Corynebacterium                           | fournieri/mucifaciens/ureicelerivora                | -2.110   | 0.0020   |
|                                     | Fusobacteriota   | Fusobacterium                             | periodonticum                                       | -2.235   | 6.54E-04 |
|                                     | Proteobacteria   | Novosphingobium                           | ..                                                  | -2.288   | 3.89E-04 |
|                                     | Firmicutes       | Eubacterium ruminantium group             | ..                                                  | -2.320   | 9.31E-04 |
|                                     | Firmicutes       | Ruminococcus                              | bromii                                              | -2.371   | 4.56E-04 |
|                                     | Firmicutes       | Anaerococcus                              | ..                                                  | -2.401   | 2.53E-04 |
|                                     | Actinobacteriota | Corynebacterium                           | kroppenstedtii                                      | -2.569   | 6.74E-04 |
|                                     | Firmicutes       | Eubacterium coprostanoligenes             | ..                                                  | -2.673   | 2.67E-04 |
|                                     | Actinobacteriota | Bifidobacterium                           | adolescentis/faecale/stercoris                      | -2.746   | 7.58E-05 |
|                                     | Firmicutes       | Blautia                                   | ..                                                  | -2.783   | 5.82E-05 |
|                                     | Actinobacteriota | Cutibacterium                             | granulosum                                          | -2.983   | 2.33E-05 |
|                                     | Proteobacteria   | Bradyrhizobium                            | ..                                                  | -3.164   | 2.81E-08 |
|                                     | Actinobacteriota | Corynebacterium                           | amycolatum/jeikeium/lactis/urealyticum/vitaeruminis | -3.930   | 4.50E-08 |
|                                     | Actinobacteriota | Corynebacterium                           | kroppenstedtii                                      | -4.323   | 4.50E-08 |
|                                     | Actinobacteriota | Corynebacterium                           | kroppenstedtii                                      | -4.376   | 3.58E-05 |
|                                     | Actinobacteriota | Cutibacterium                             | ..                                                  | -4.517   | 2.84E-08 |
|                                     | Actinobacteriota | Lawsonella                                | ..                                                  | -4.909   | 9.76E-11 |
|                                     | Actinobacteriota | Corynebacterium                           | aurimucosum/pseudogenitalium/tuberculostearicum     | -4.933   | 6.62E-08 |
|                                     | Actinobacteriota | Corynebacterium                           | kroppenstedtii                                      | -5.273   | 4.22E-10 |
|                                     | Actinobacteriota | Cutibacterium                             | acnes/avidum                                        | -5.502   | 6.09E-13 |
|                                     | Actinobacteriota | Corynebacterium                           | kroppenstedtii                                      | -5.568   | 1.68E-08 |
| Actinobacteriota                    | Corynebacterium  | bovis                                     | -6.193                                              | 2.27E-12 |          |
| Actinobacteriota                    | Corynebacterium  | ..                                        | -7.277                                              | 2.91E-13 |          |
| Actinobacteriota                    | Corynebacterium  | ..                                        | -7.556                                              | 4.89E-20 |          |
| Actinobacteriota                    | Corynebacterium  | kroppenstedtii                            | -7.566                                              | 4.94E-17 |          |
| Actinobacteriota                    | Corynebacterium  | macginleyi                                | -8.585                                              | 4.94E-17 |          |
| Actinobacteriota                    | Corynebacterium  | bovis                                     | -8.716                                              | 4.94E-17 |          |

**Supplemental Table 2. Microbial organisms associated with relatively abundant amplicon sequence variants (ASVs) in control subjects compared to patient samples without eyedrops.** The patient samples represent those coming from the eye without glaucoma and no

medication therapy. ASVs were classified taxonomically using QIIME2 q2-feature-classifier plugin by identifying k-mers that are diagnostic for particular taxonomic groups. In our analysis, we used a 99% SILVA reference set trained on the 16S region. The classified phyla, genus, and species are noted in the table. Log2foldchange is the effect size estimate representing the change in abundance of an ASV, with increased abundance in controls as positive values and increased abundance in treated patients as negative values. The p-values are generated using the Wald test and corrected for false discovery rate (FDR) using the Benjamini and Hochberg method. Corrected p-values < 0.05 were considered significant. Only significantly abundant organisms were included in the table and corrected p-values are shown.
